# Supplementary material
Source: publisher figshare collection journal article supplement (https://tandf.figshare.com/ndownloader/files/21289008)
Supplement: Supplementary file 1 [file 21289008]

Supplementary Material


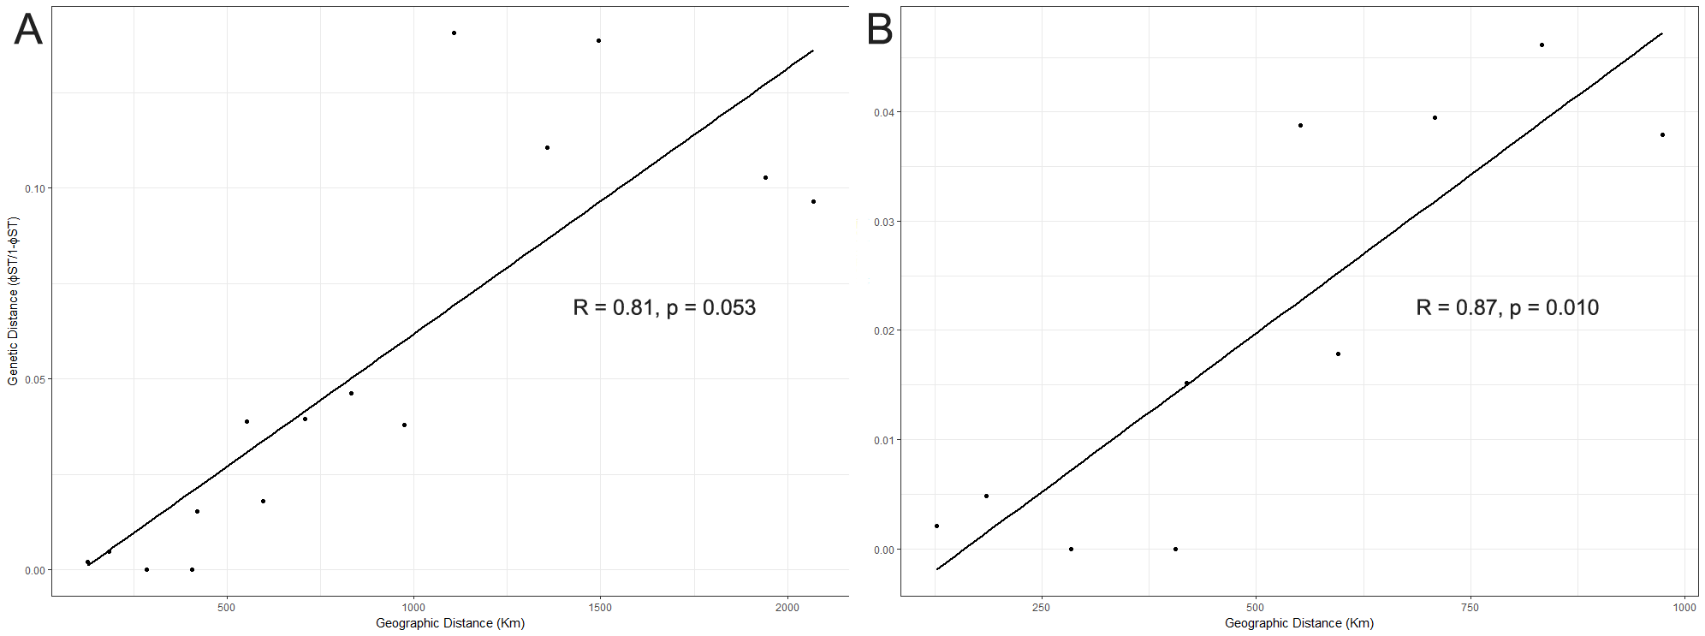


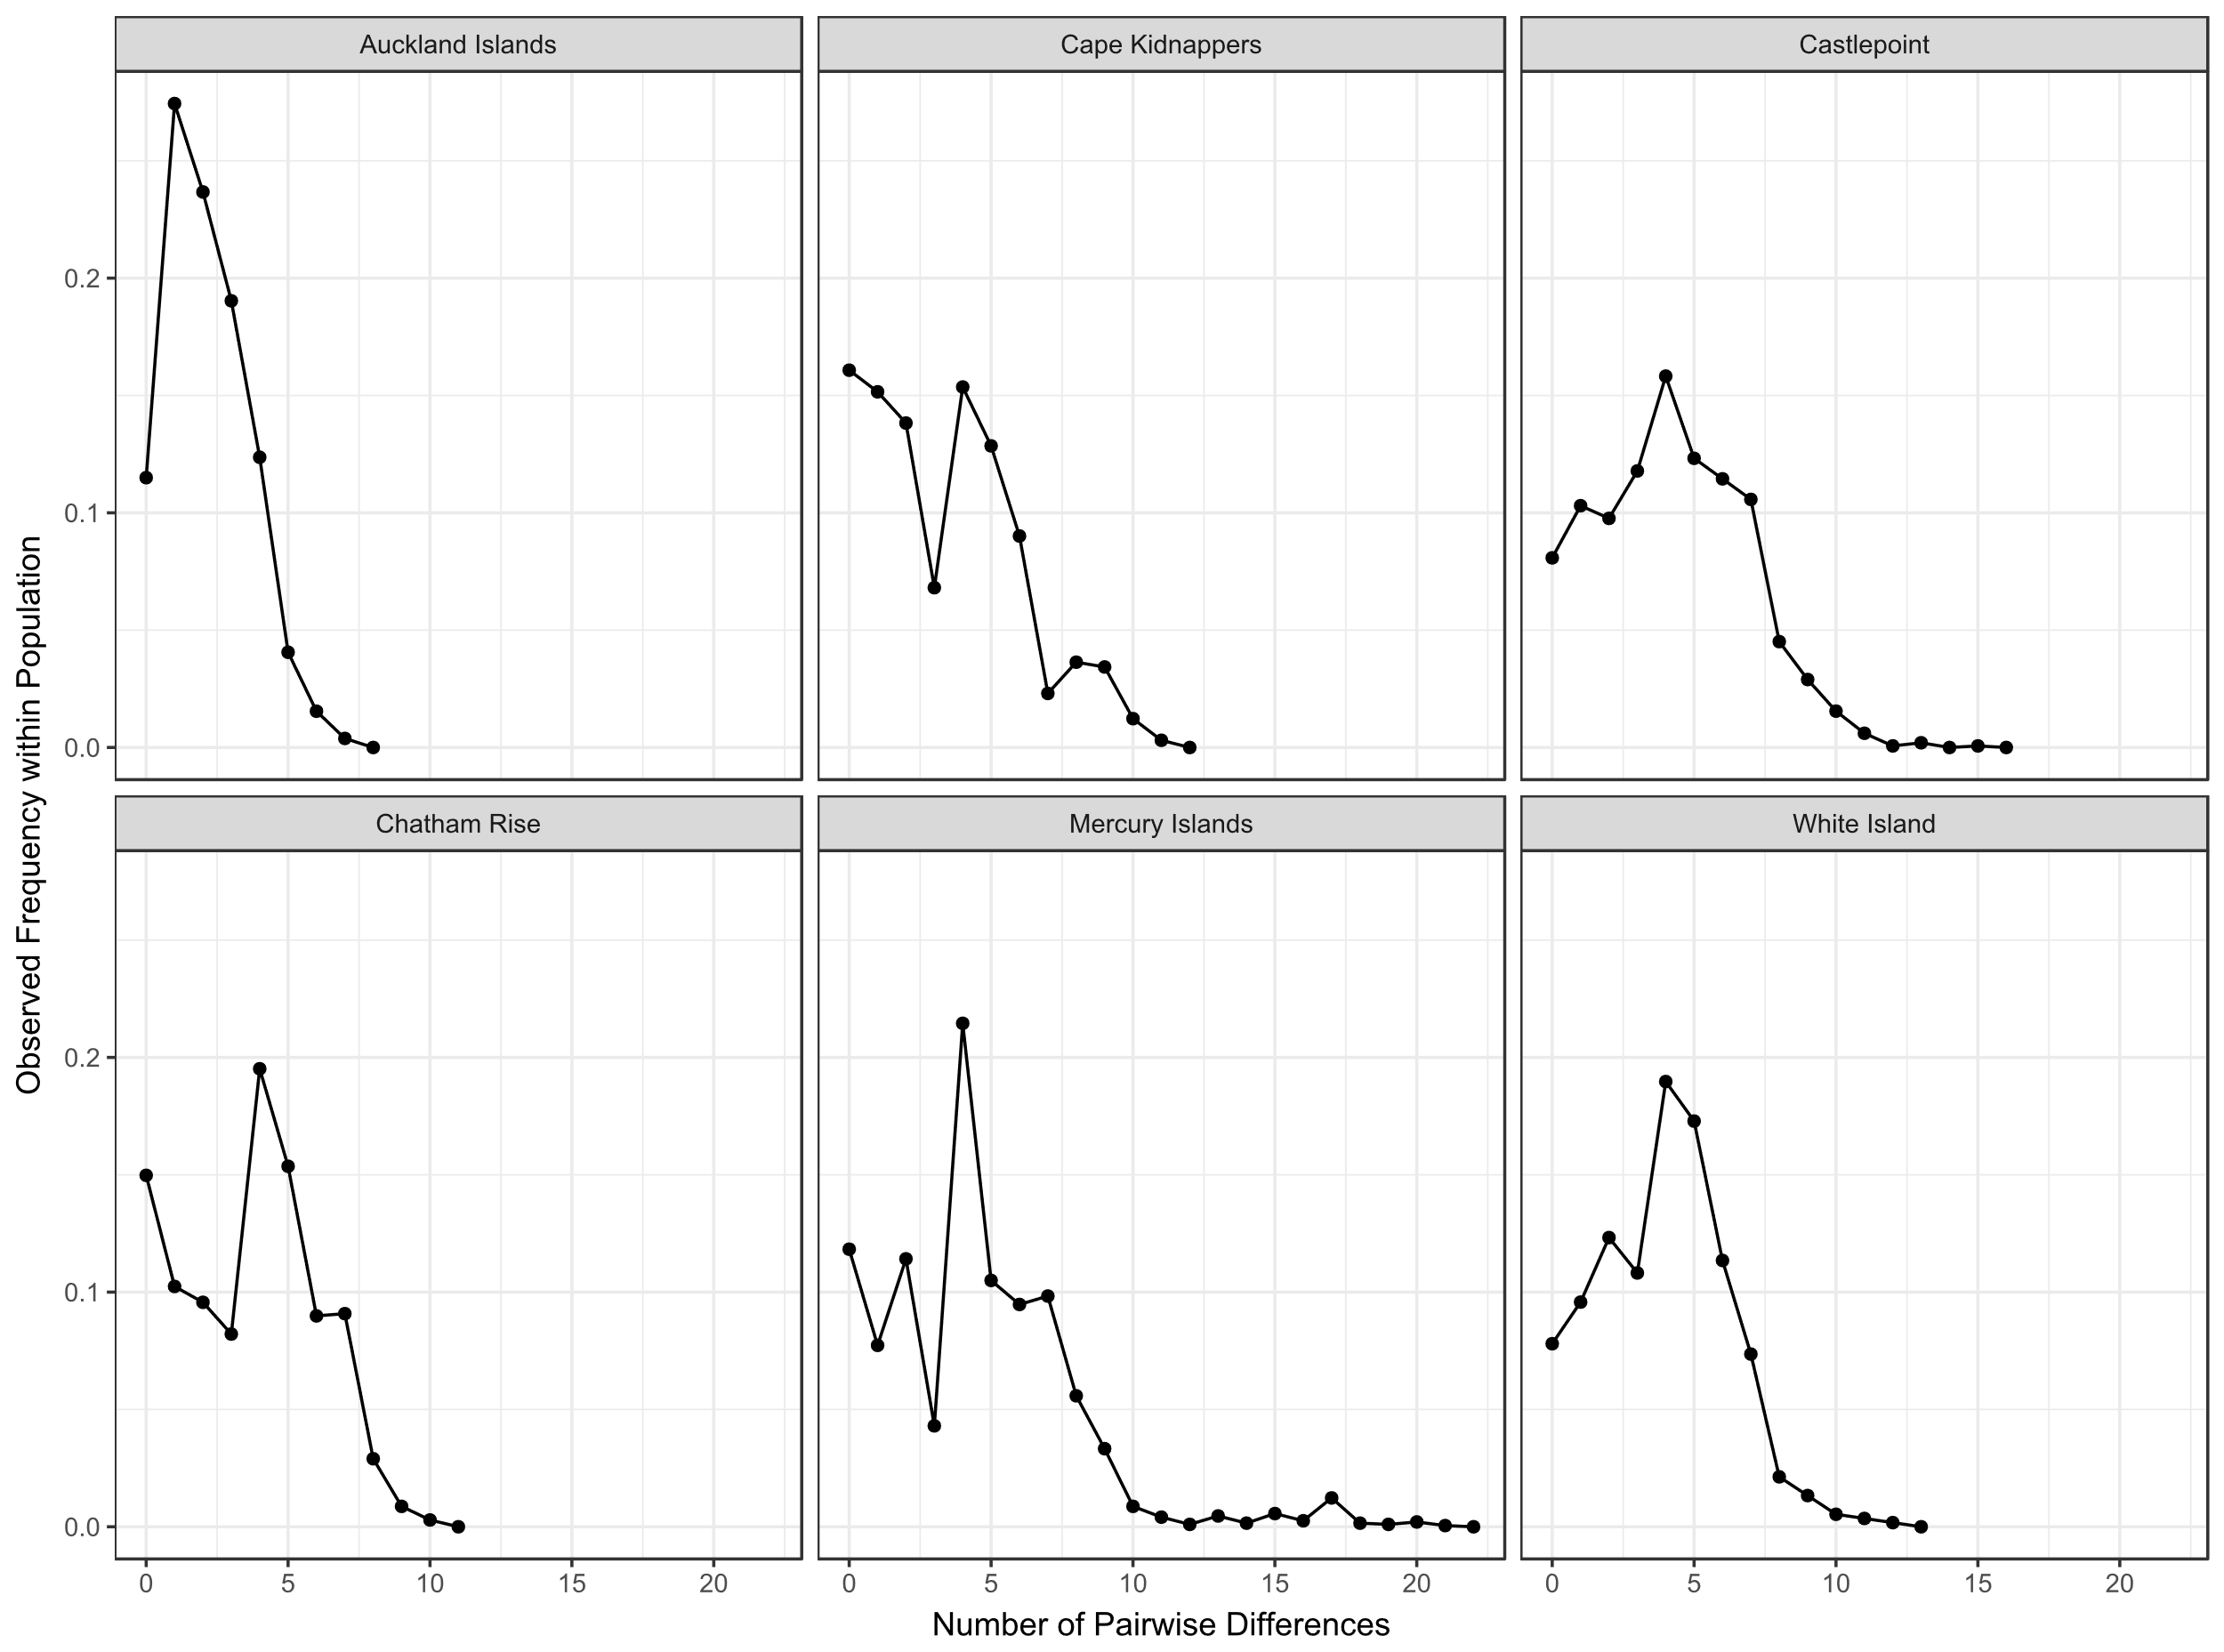
**Figure S1:** Isolation by distance graphs for NZ scampi populations. A: All sample sites considered, B: Auckland Islands site removed. The correlation coefficient and p-value (obtained via Mantel test) are displayed.

**Figure S2:** Mismatch distribution plots for each sampling site.
